# Supplementary material
Source: PubMed Central journal article supplement (PMC3008339)

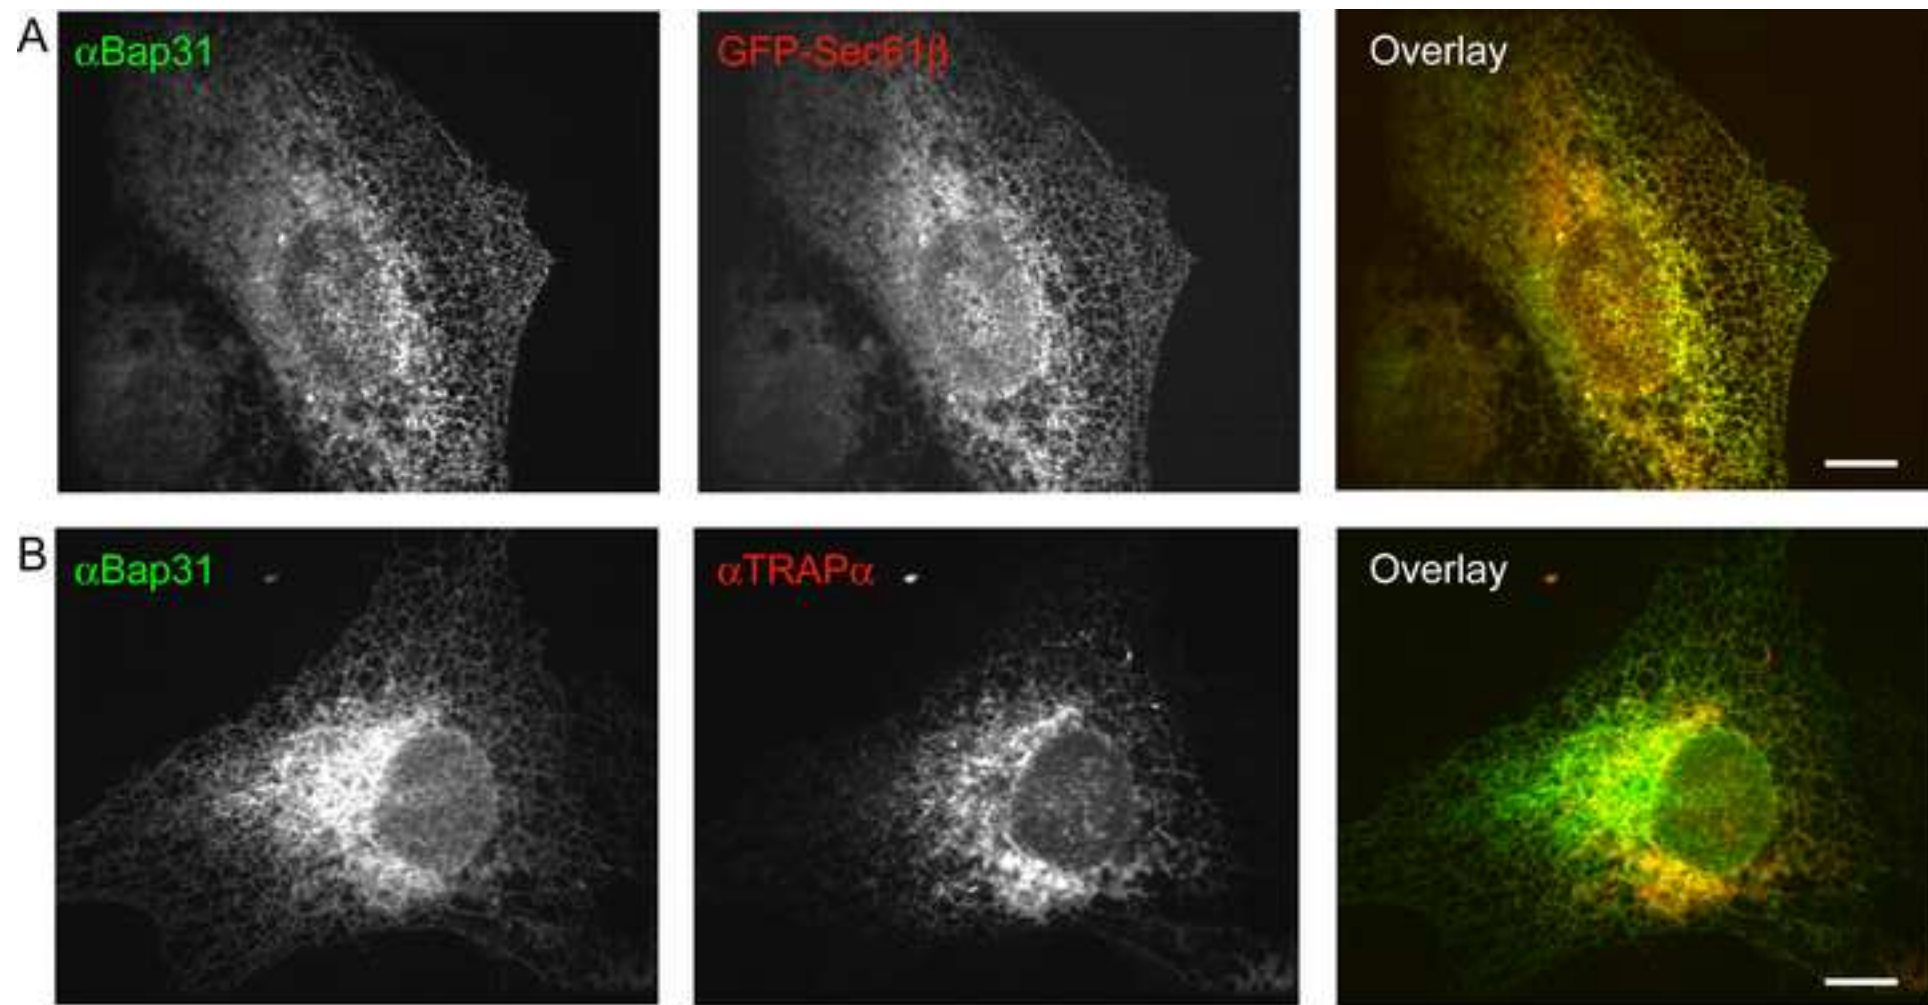

Figure S1

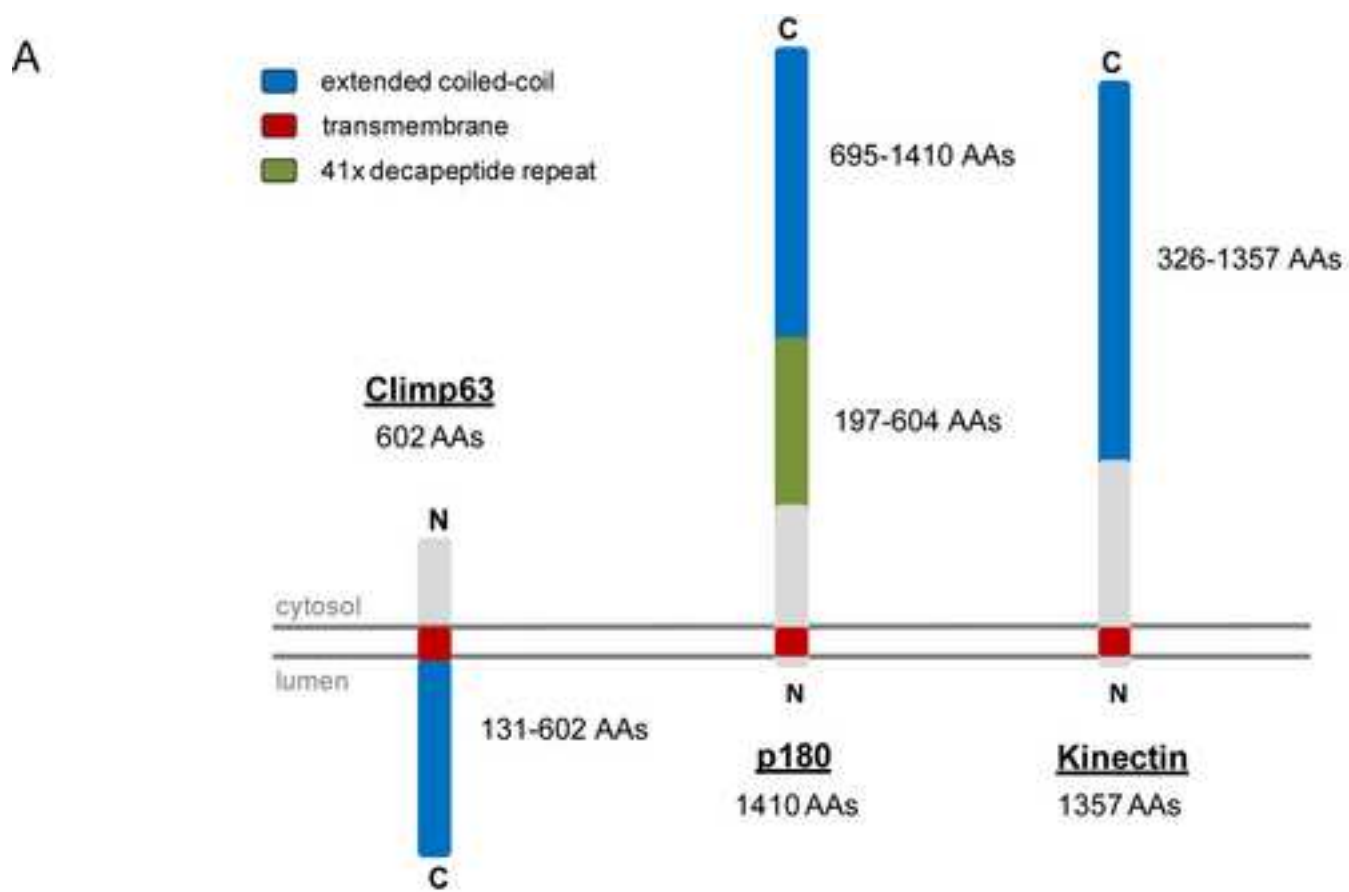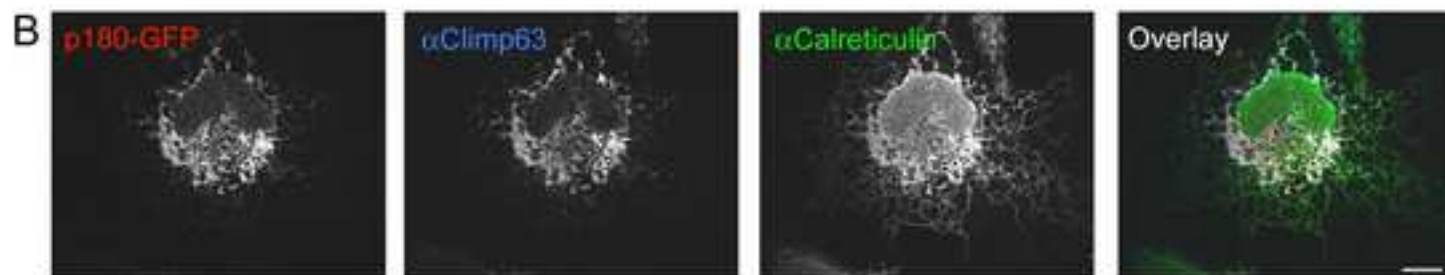

Figure S2

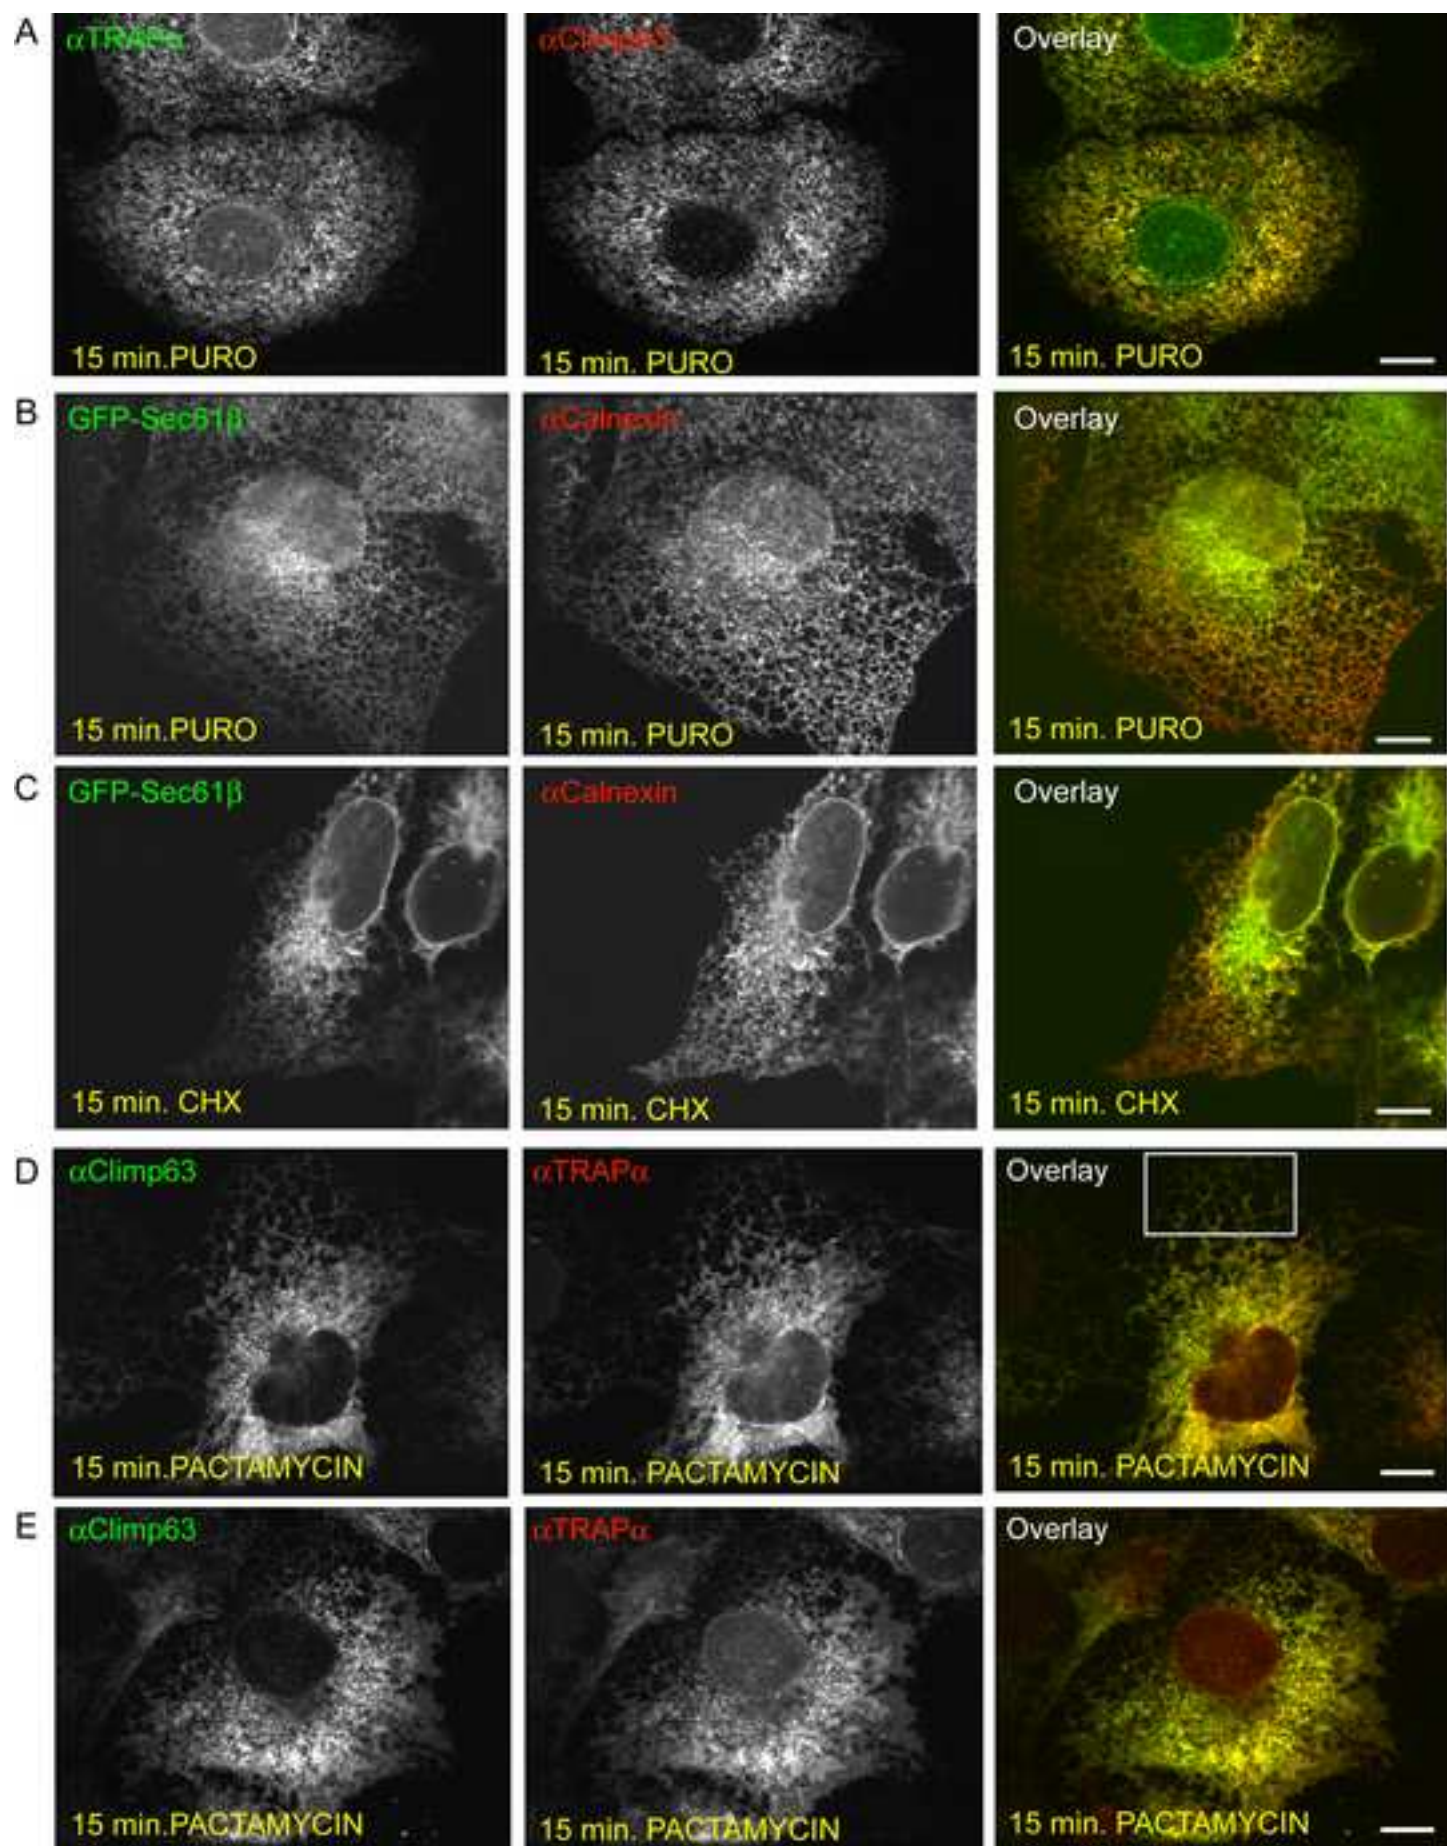

Figure S3

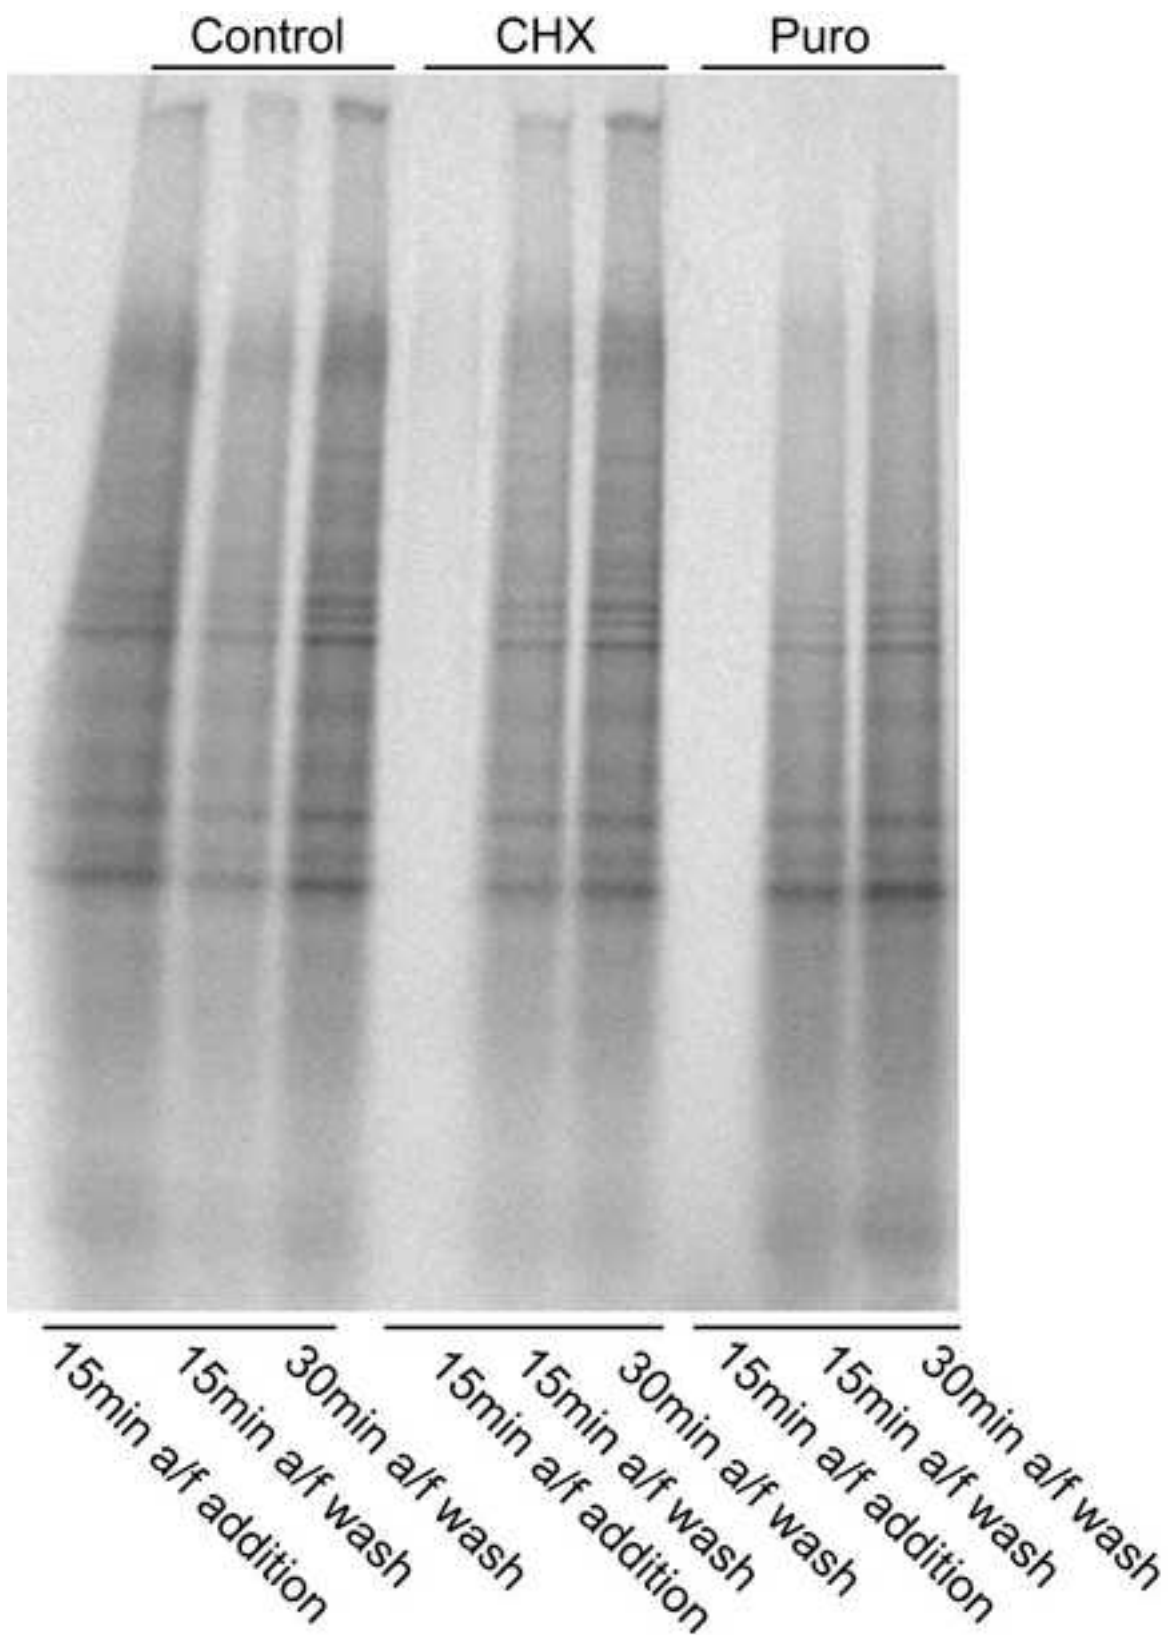

Figure S4



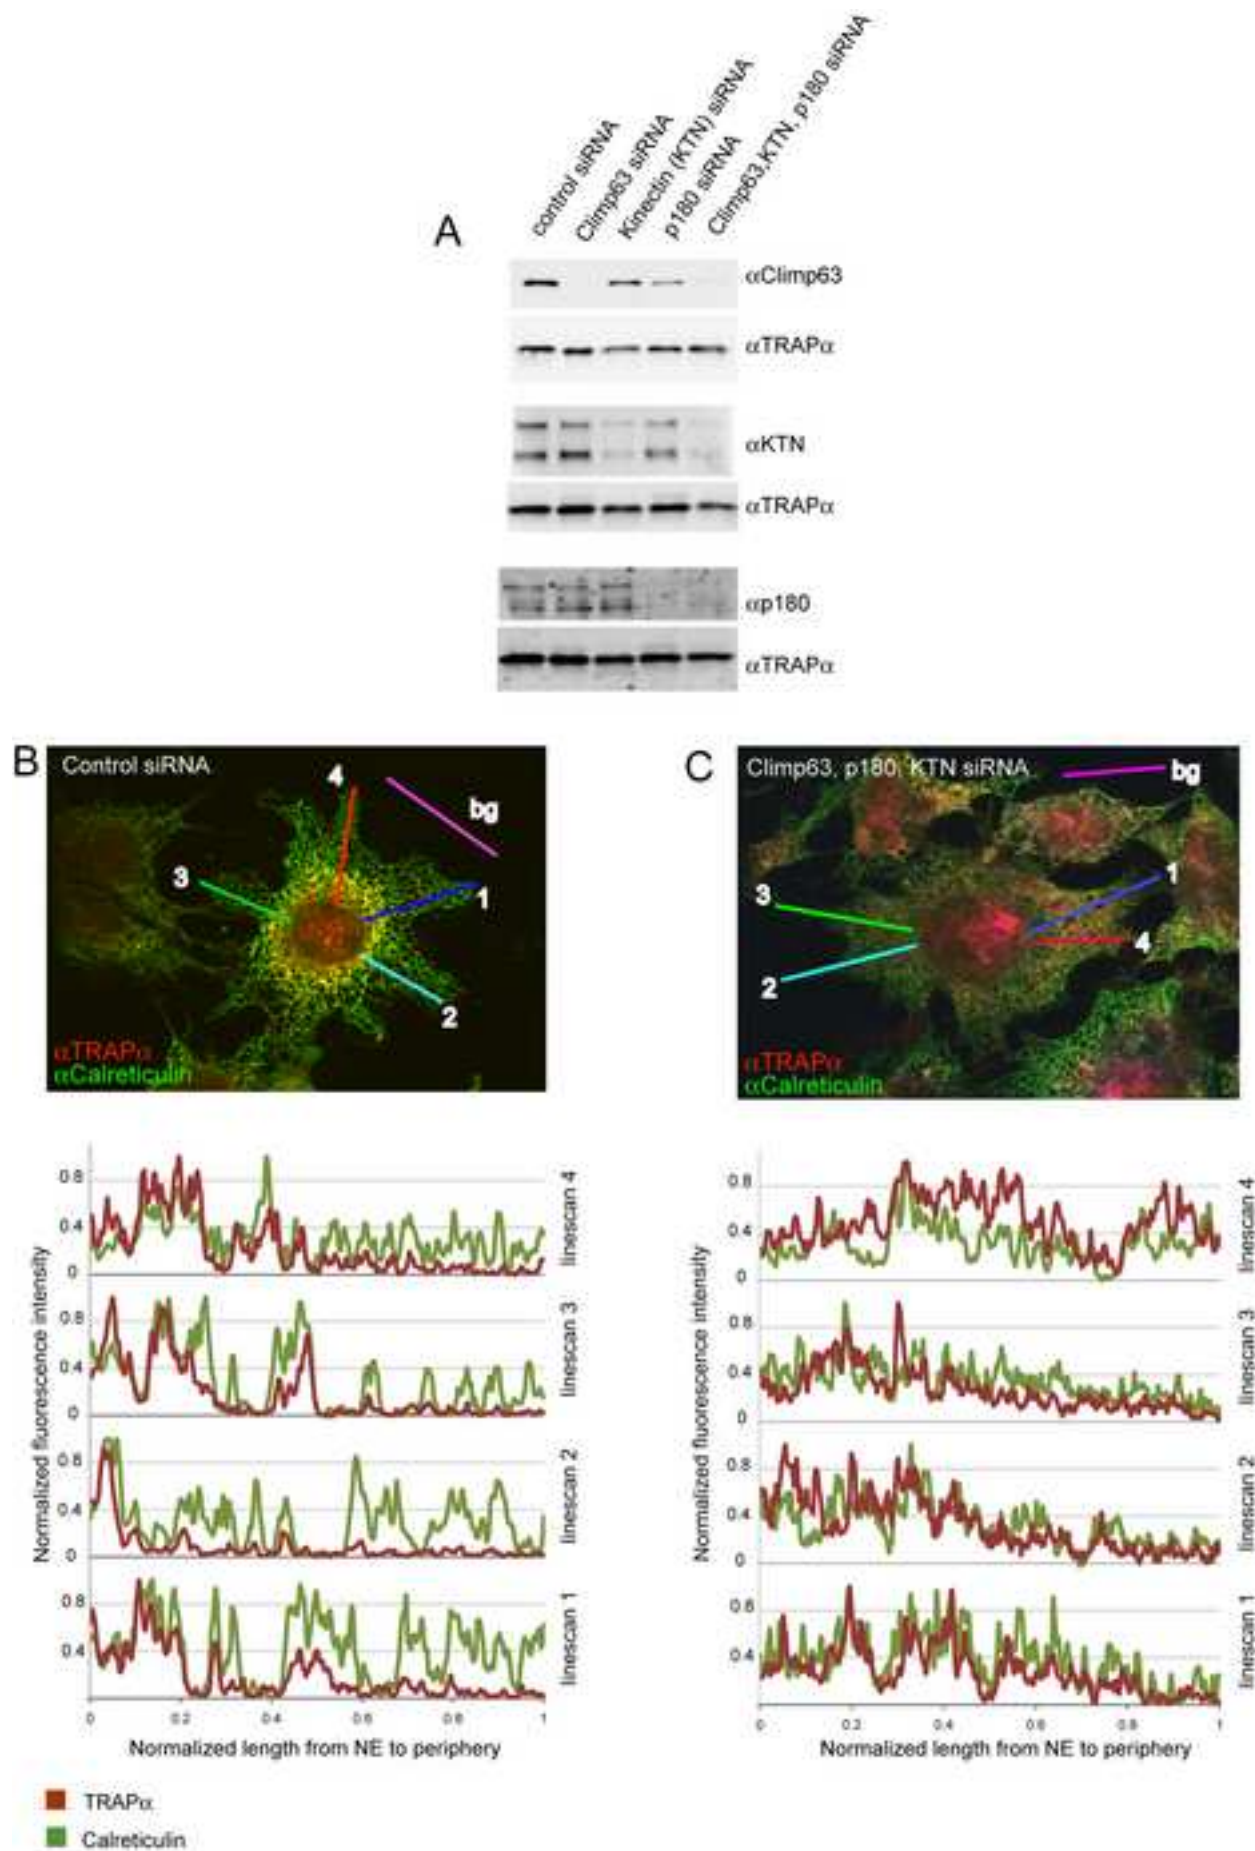

Figure S5

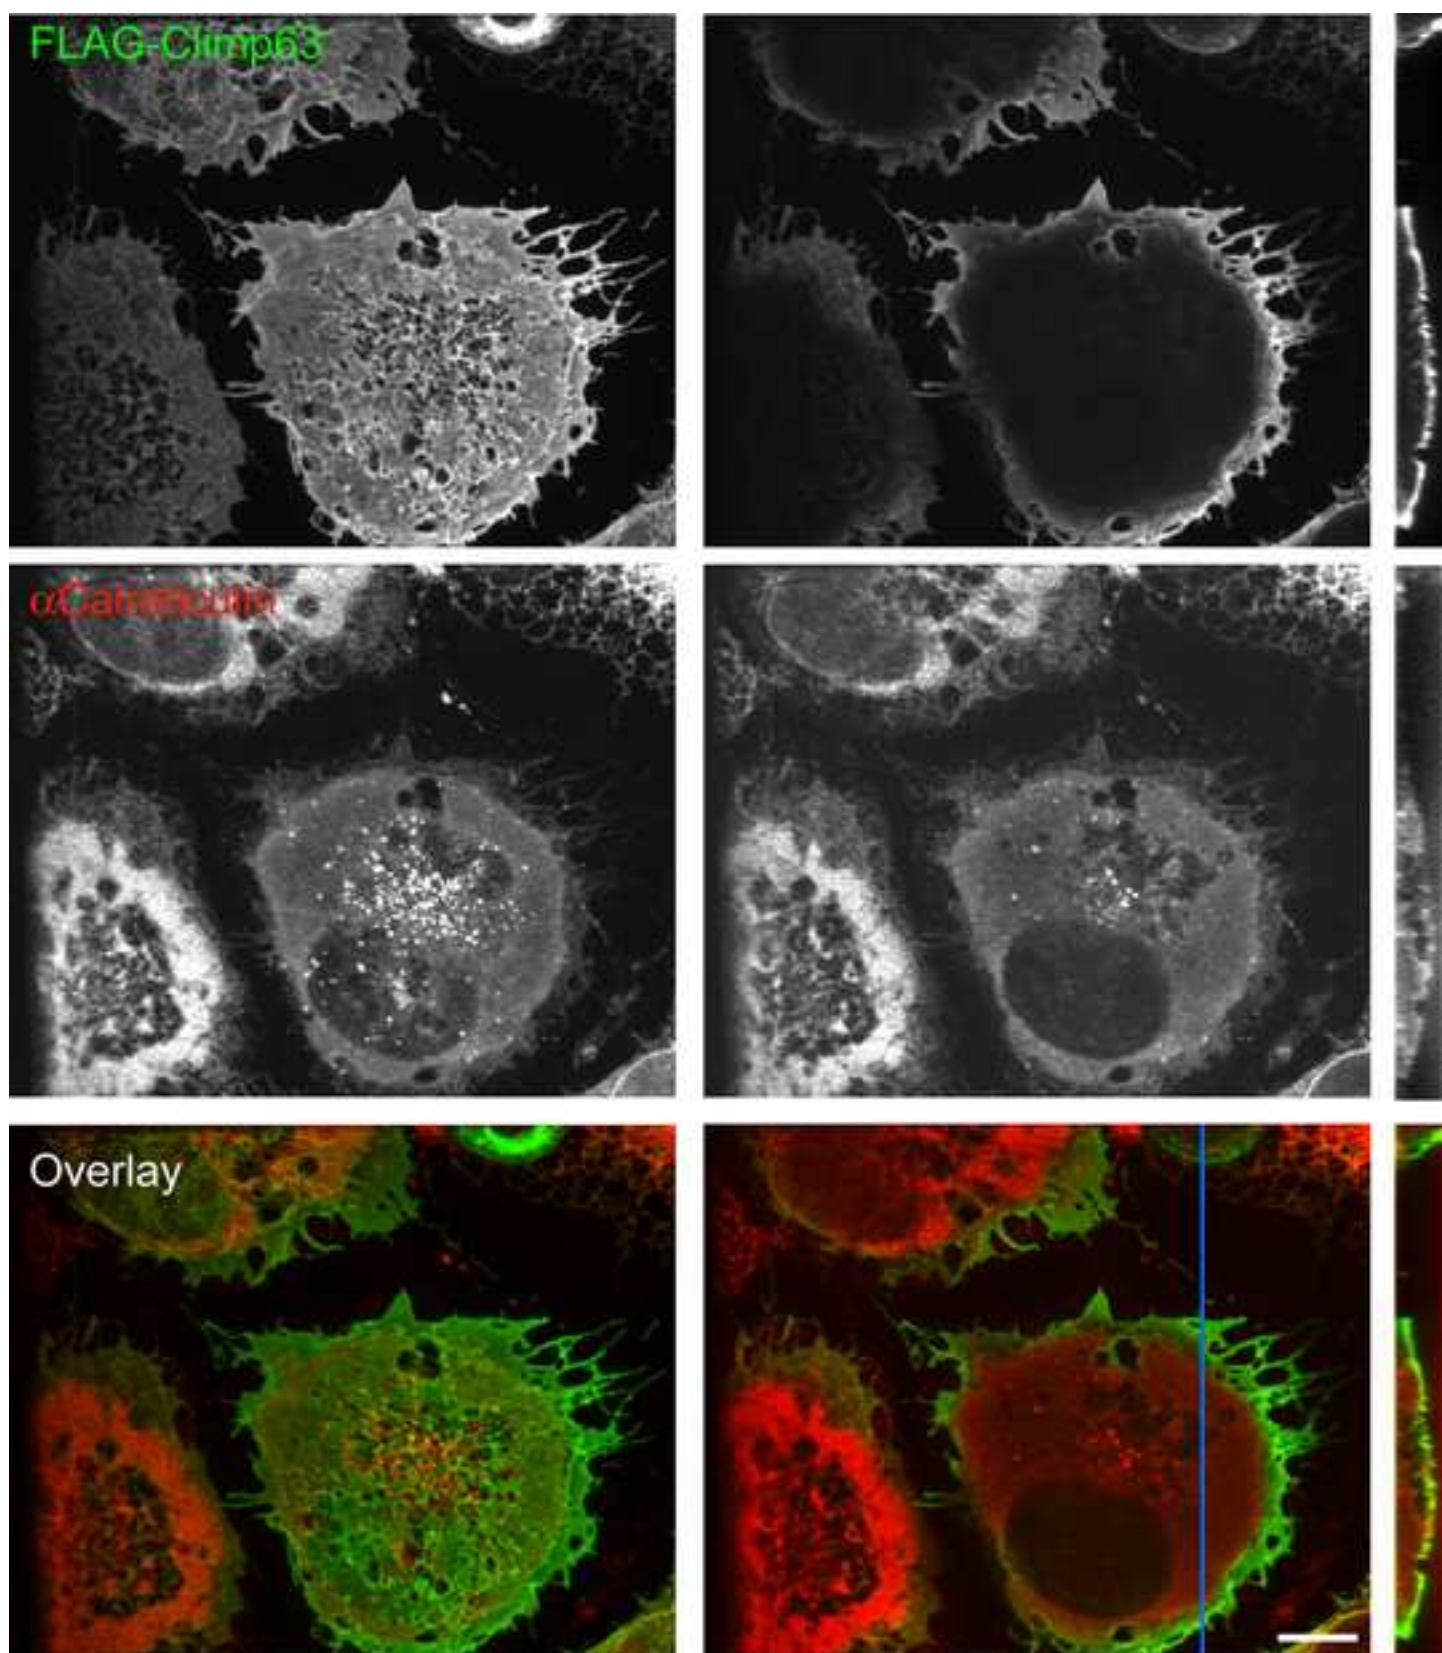

Figure S6

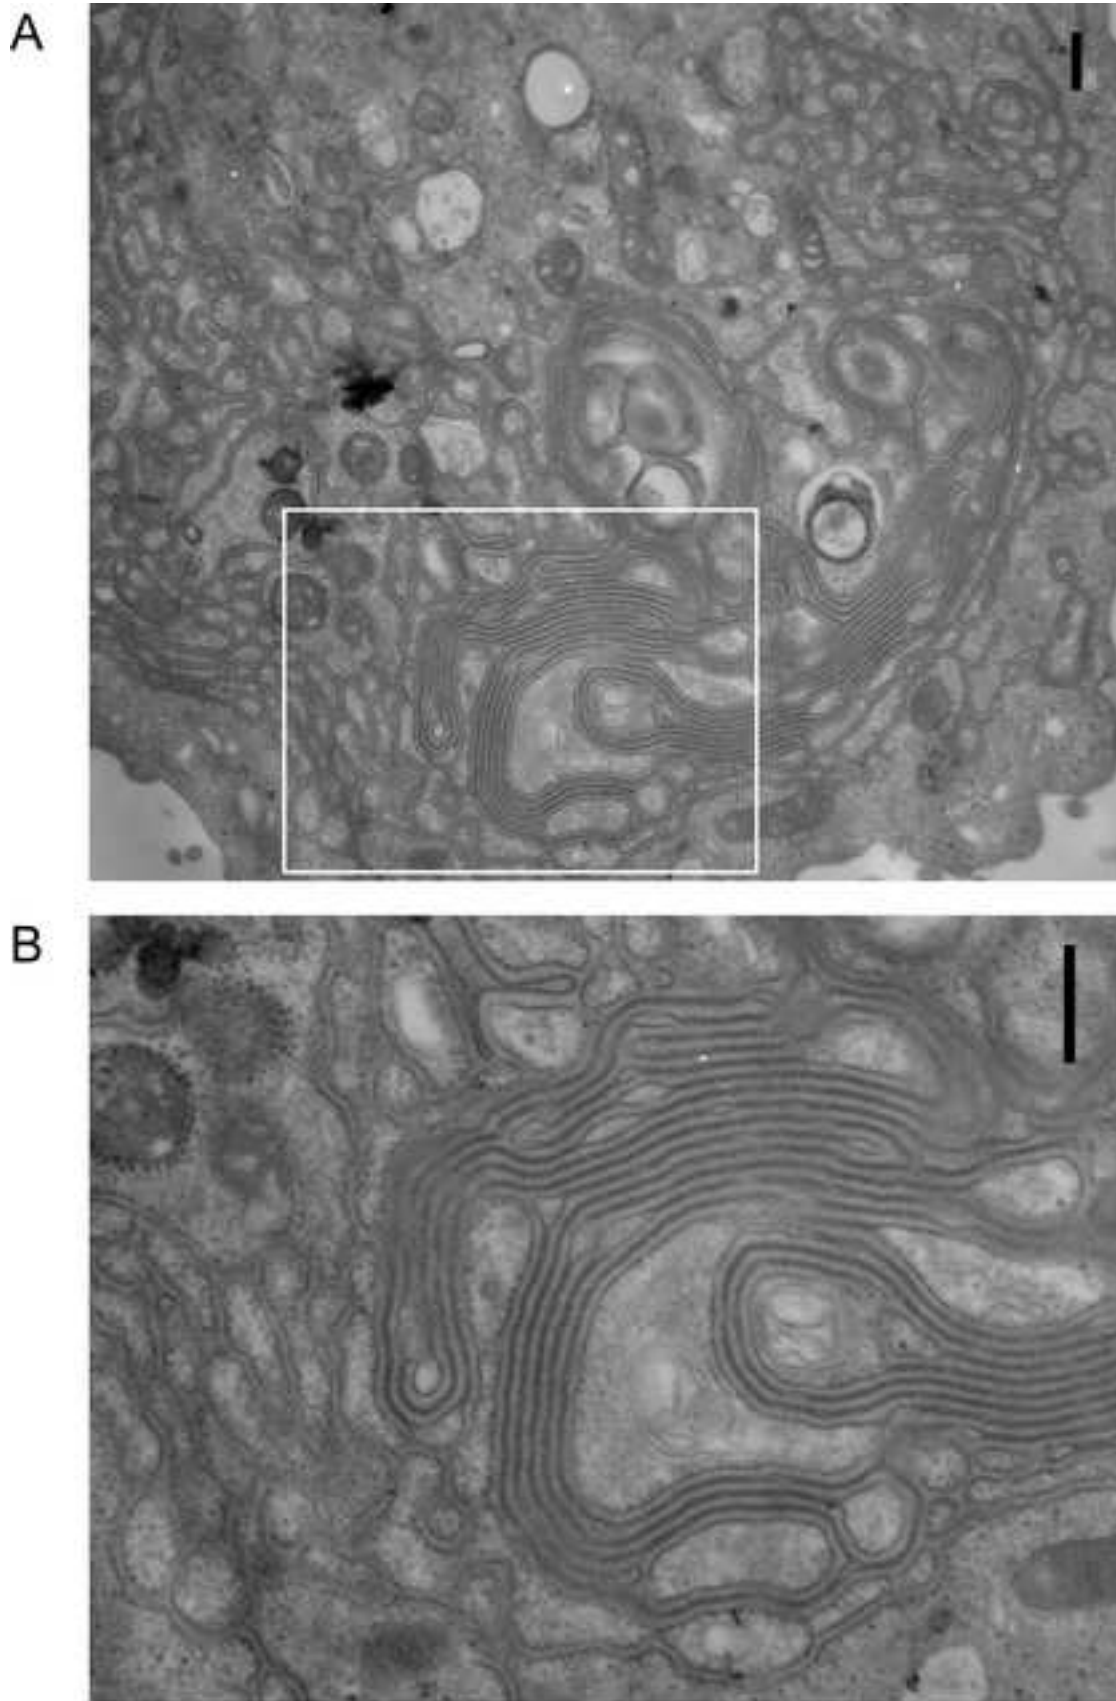

Figure S7

Supplement: NIHMS256676-supplement-02.pdf [file NIHMS256676-supplement-02.pdf]
